# Supplementary material
Source: PubMed Central journal article supplement (PMC10822051)
Supplement: NIHMS1955029-supplement-Supplementary_Material.pdf [file NIHMS1955029-supplement-Supplementary_Material.pdf]

## **SUPPLEMENTARY INFORMATION**

### **Tunable and Compartmentalized Multimaterial Bioprinting for Complex Living Tissue Constructs**

*Shabir Hassan<sup>1</sup>, Eduardo Gomez Reyes<sup>1,2</sup>, Eduardo Enciso-Martinez<sup>1,2</sup>, Kun Shi<sup>1,3</sup>, Jorge Gonzalez Campos<sup>1,2</sup>, Oscar Yael Perez Soria<sup>1,2</sup>, Eder Luna-Cerón<sup>1,2</sup>, Myung Chul Lee<sup>1</sup>, Isaac Garcia Reyes<sup>1,2</sup>, Joshua Steakelum<sup>1,5</sup>, Haziq Jeelani<sup>4</sup>, Luis Enrique García-Rivera<sup>1,2</sup>, Minsung Cho<sup>6</sup>, Stephanie Sanchez Cortes<sup>1,2</sup>, Tom Kamperman<sup>1,7</sup>, Haihang Wang<sup>1</sup>, Jeroen Leijten<sup>7</sup>, Lance Fiondella<sup>5</sup>, Su Ryon Shin<sup>1\*</sup>*

<sup>1</sup>Division of Engineering in Medicine, Department of Medicine, Harvard Medical School, and Brigham and Women's Hospital, Cambridge, MA, 02139, USA.

<sup>2</sup>Tecnológico de Monterrey at Monterrey, Monterrey, Nuevo León, CP 64849, Mexico

<sup>3</sup>State Key Laboratory of Biotherapy and Cancer Center, West China Hospital, Sichuan University and Collaborative Innovation Center of Biotherapy, Chengdu, 610041, PR China

<sup>4</sup> Institute of Electrical and Electronics Engineers (IEEE), New York, 10016, USA.

<sup>5</sup> Department of Electrical and Computer Engineering, University of Massachusetts, Dartmouth MA 02747, USA

<sup>6</sup> AltrixBio inc., Cambridge, MA 02139, USA

<sup>7</sup> Department of Developmental Bioengineering, Faculty of Science and Technology, TechMed Centre, University Twente, Enschede, 7522 NB, Netherlands

\*Correspondence at: [sshin4@bwh.harvard.edu](mailto:sshin4@bwh.harvard.edu); [shin.lotus@gmail.com](mailto:shin.lotus@gmail.com)

## **Contents**

### **Supplementary Figures**

Figure S1 | M<sup>3</sup> bioprinting system

Figure S2 | Unique printing shapes from M<sup>3</sup>

Figure S3 | Y-shaped bioprinted branched vessel

Figure S4 | Mechanical and rheological properties of CNF, NiPAM, and GelMA composite bioink

Figure S5 | Bioprinted constructs of liver-like and muscle fiber mimic scaffolds

Figure S6 | CD31 immunostaining of bioprinted muscle fiber mimic scaffold

Figure S7 | Compressive modulus of GCGs with various ratio

Figure S8 | Reconstruction slices of the 3D volumetric rendition of the in vivo explant

### **Supplementary Movies**

Movie S1 | Pressure valve gating

Movie S2 | Printing in absence of check valves

Movie S3 | Printing in presence of check valves and fast switching

Movie S4 | Choice of bioink mixing

Movie S5 | Multimaterial bioprinting at high speed

Movie S6 | Simulation of 2 inks mixing and extrusion

Movie S7 | Simulation of 4 inks mixing and extrusion

Movie S8 | Simulation of 6 inks mixing and extrusion

Movie S9 | Simulation of 7 inks mixing for core-shell geometry

Movie S10 | Simulation of 7 inks mixing for donut shaped geometry

Movie S11 | Perfusion across a linear vessel

Movie S12 | Bioprinting of liver-like construct

Movie S13 | Bioprinting of a skeletal muscle fiber mimic construct

Movie S14 | Volumetric reconstruction of the bioprinted spiral 7 days post implantation

## **Supplementary Tables**

Supplementary Table S1 | Comparison of different multimaterial bioprinter speeds from the literature.

## Supplementary Figures

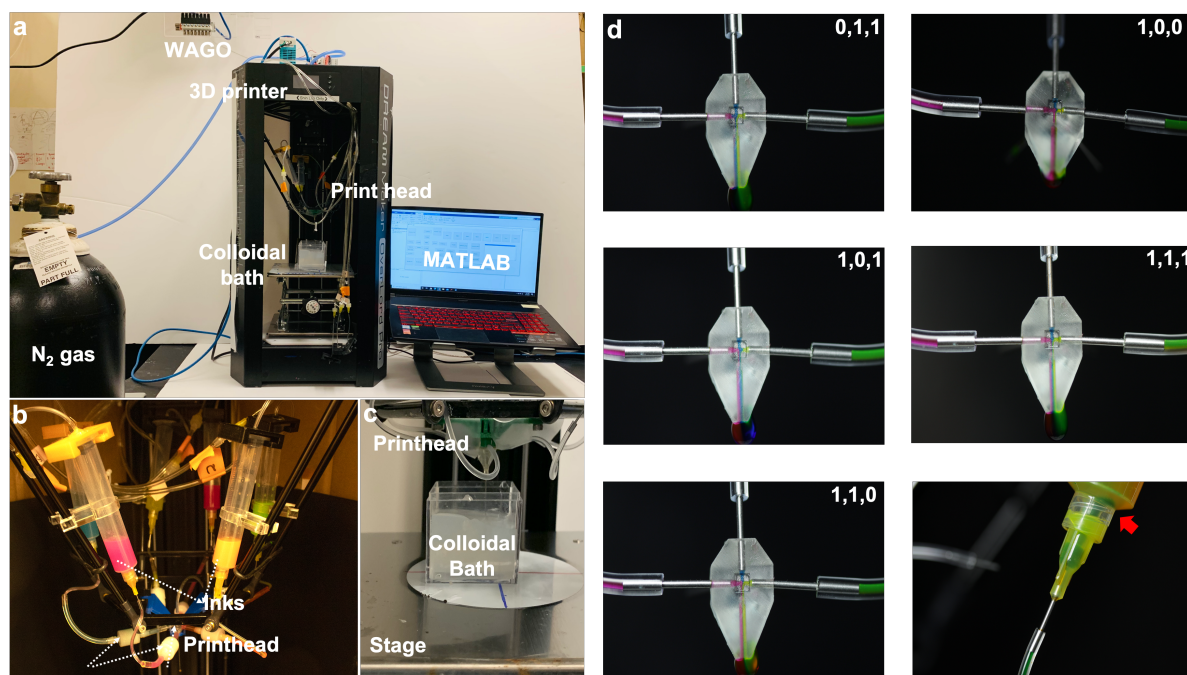

**Figure S1 | M<sup>3</sup> system.** **a**, Photograph showing different components of the printing system. **b**, Close-up of different ink syringes (6 in this case) feeding into the single nozzle printhead via check valves. **c**, colloidal bath sitting on a stage where printing happens. and **d**, Effect of check valve on ink mixing when opened (1) or closed (0) for Red (R), Green (G), and Blue (B), respectively. Binary codes are sequentially for RGB inks.

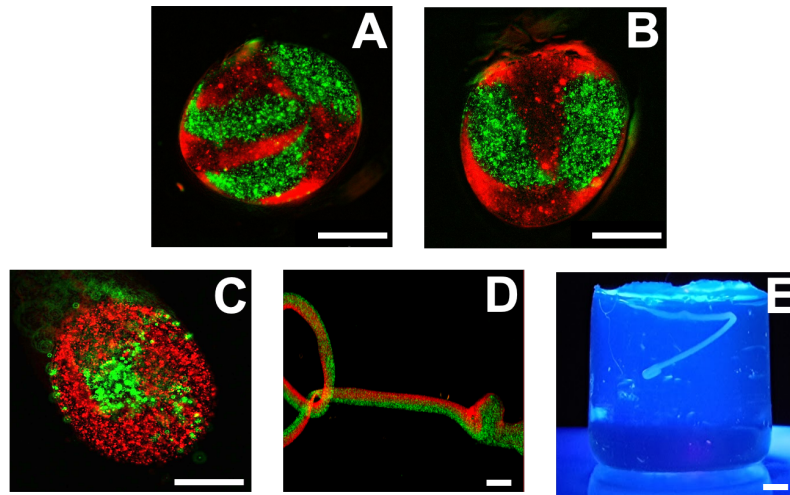

**Figure S2 | Unique printing shapes from  $M^3$ .** **a**, basket shape, **b**, insect eye, **c**, solid donut with green core and red shell, **d**, knot, **e**, serpentine shapes, respectively. Scale bars=500  $\mu\text{m}$ .

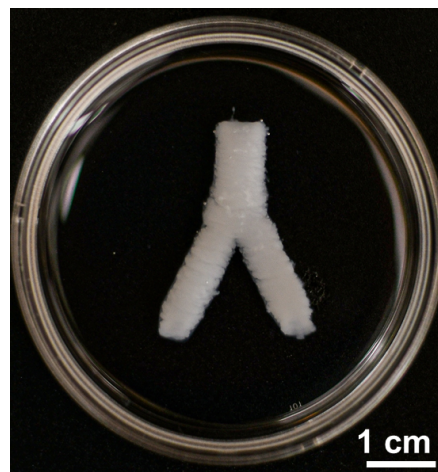

**Figure S3 | Y-shaped bioprinted branched vessel in high resolution.**

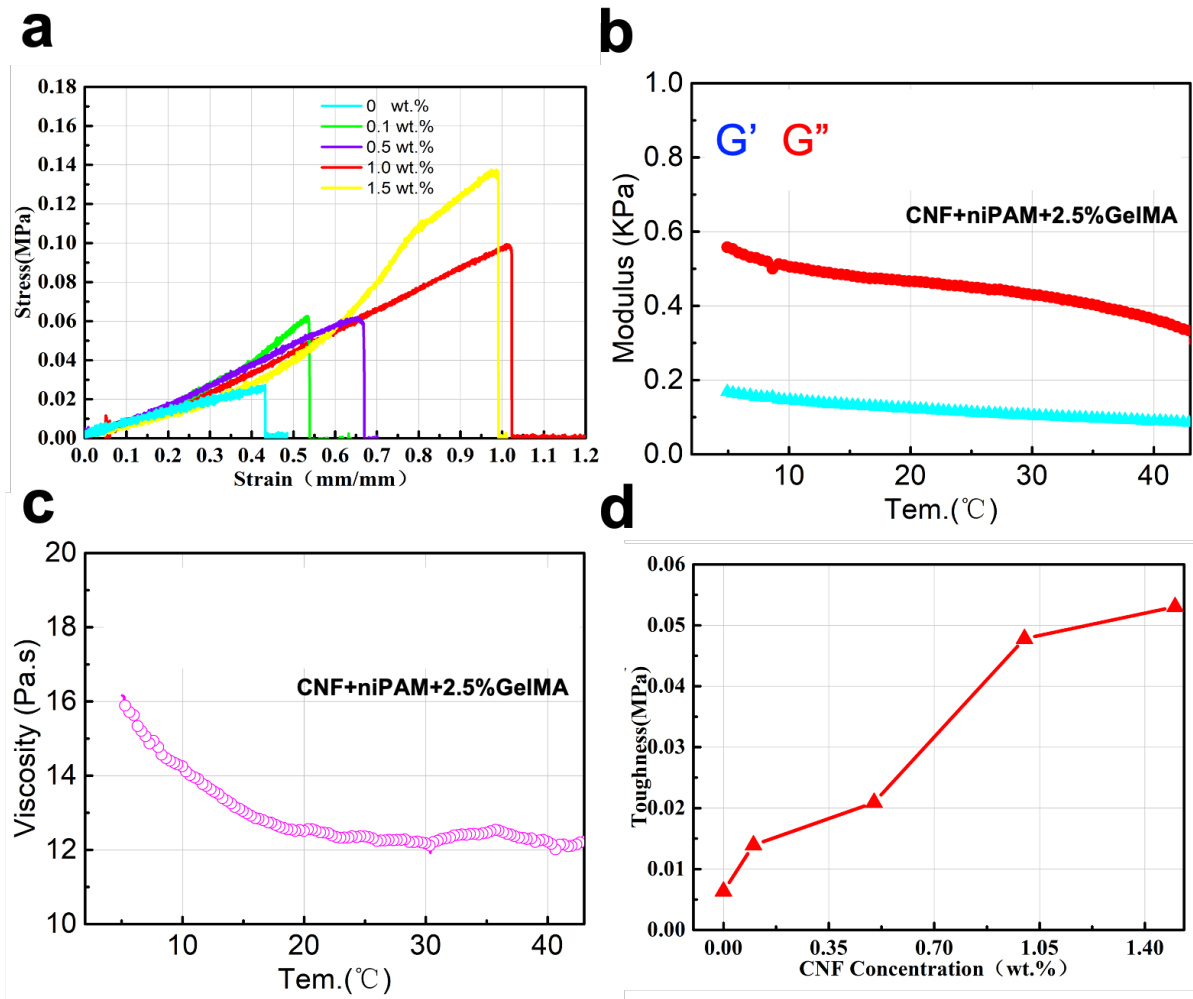

**Figure S4 | Mechanical and rheological properties of CNF, NIPAM, and GelMA composite bioink.** **a**, Stress strain curves of composite inks at different wt% of CNF. **b**, Storage ( $G'$ ) and loss ( $G''$ ) moduli of the composite inks. The higher  $G'$  values than the  $G''$  values correspond to high fidelity prints from the ink. **c**, Effect on viscosity as a function of temperature. The inks flow efficiently at and above the temperatures of 20 °C, the temperature. **d**, Graph shows the effect of increasing CNF on the toughness of the ink.

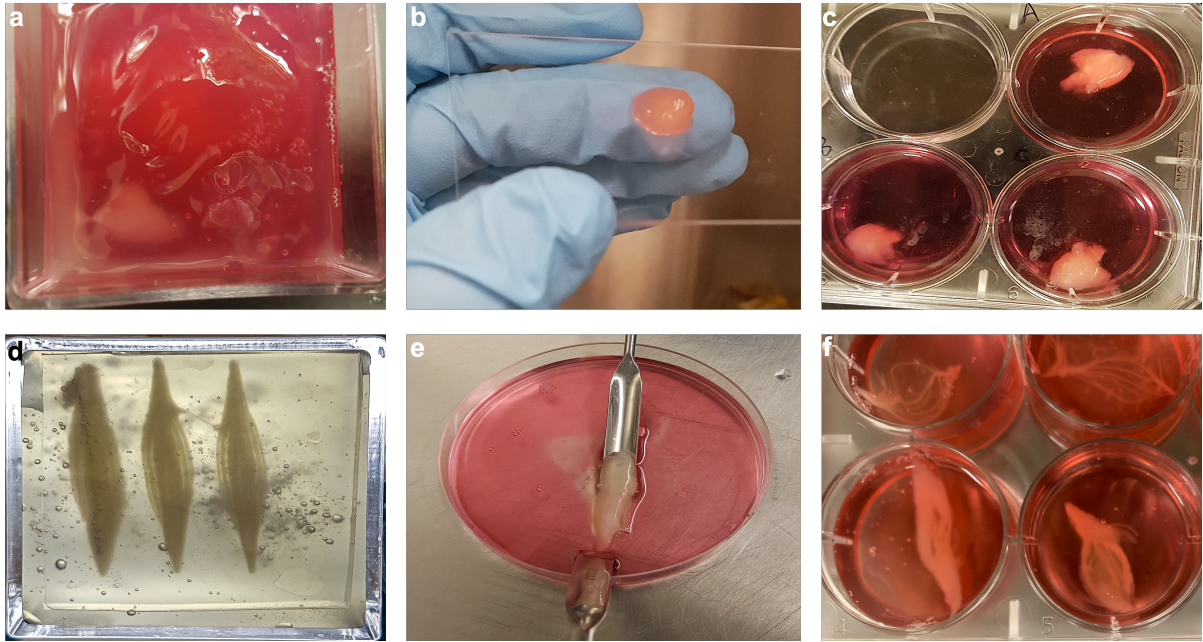

**Figure S5 | Bioprinted constructs of liver-like and muscle fiber mimic constructs. a-c)** Printed liver-like construct in a GCG bath before taking out for culturing, after washing off GCG, and in culture media, respectively. **d**, Several muscle fiber mimic constructs can be printed at the same time in a single support bath. **e**, Individual fibrils in the muscle fiber can be seen clearly; **f**, GCG washed off from the printed muscle fiber before being put in the incubator for cell culture in **e**.

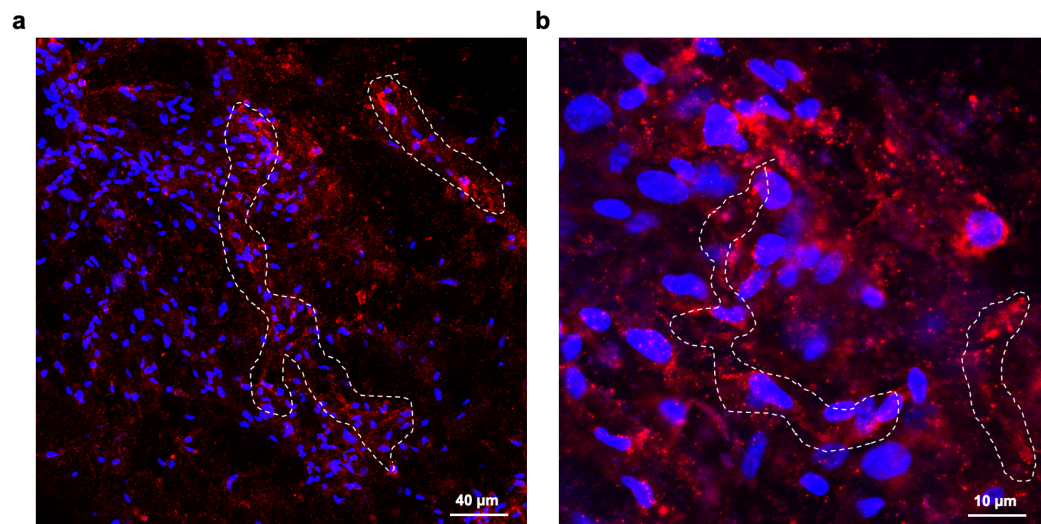

**Figure S6: CD31 immunostaining of bioprinted muscle fiber mimic scaffold.** The figures show the areas of possible initiation of neovascularization on account of a stronger CD31 signal at different magnifications (a) and (b).

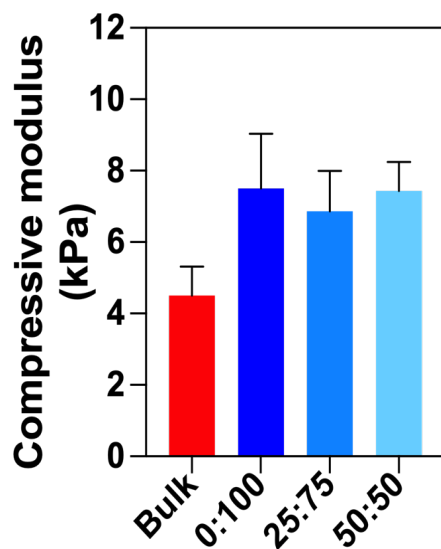

**Figure S7 | Compressive modulus of GCGs.** Compressive moduli of GCGs with different gelatin: GelMA ratio (gelatin: GelMA = 0:100, 25: 75, and 50:50).

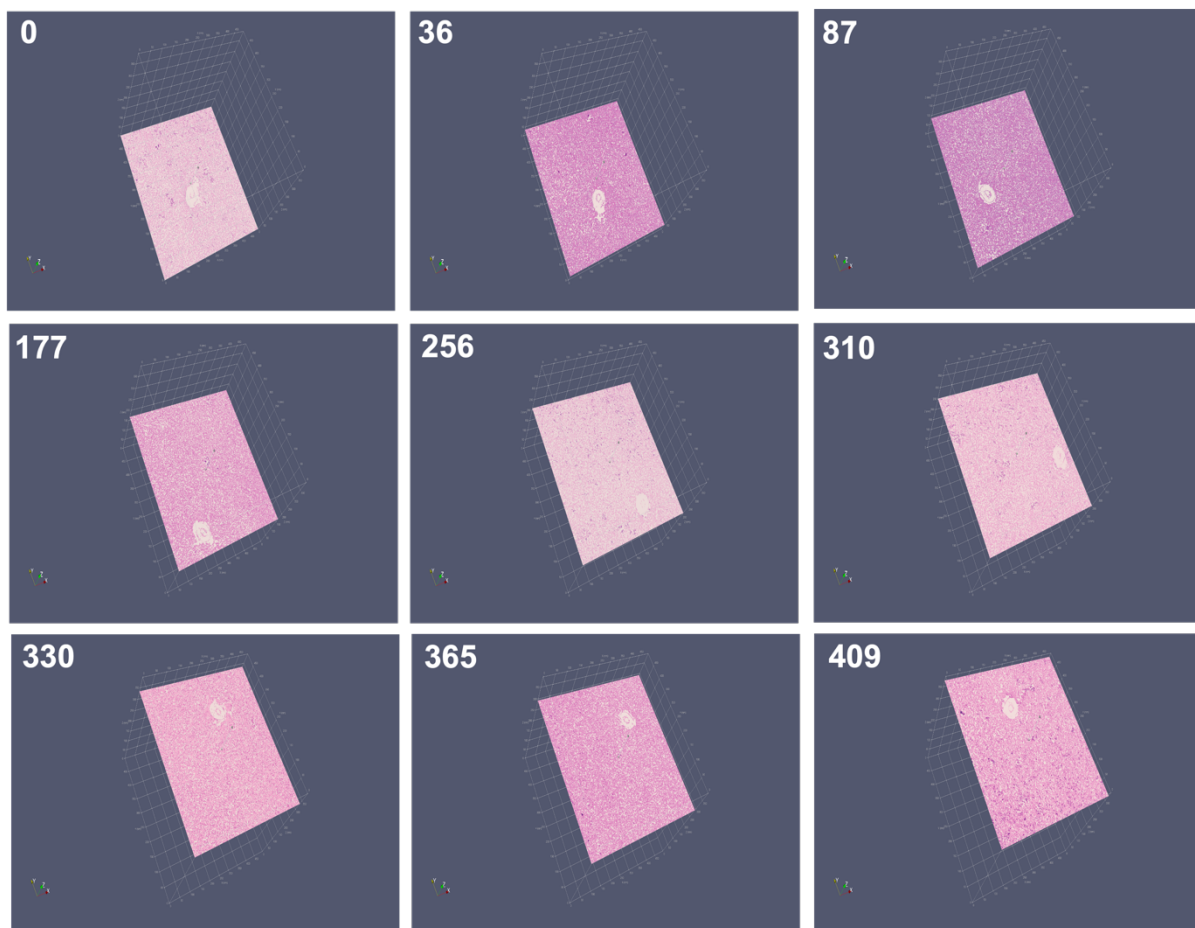

**Figure S8 | Reconstruction slices of the 3D volumetric rendition of the in vivo explant.**

Numbers on the images depict the slice number of the snapshots reconstructed by SIRT for the volume rendition.

### **Supplementary Movies**

**Movie S1 | Pressure valve gating.** Simulation showing controlled dispensation of 7 different inks through the printhead.

**Movie S2 | Printing in absence of check valves.** Ink mixing due to backflow pressure in absence of check valves. Scale bar 5 mm.

**Movie S3 | Printing in presence of check valves and fast switching.** Inks can flow individually without backflow pressure and hence no intermixing in presence of check valves. Check valves in this case were switched at 5Hz. Scale bar 5 mm.

**Movie S4 | Choice of bioink mixing.** Ink extrusions can be controlled with precision. Shown in the video is co-flow of RGB, R, B, G, RB, RG, and BG inks in a sequential manner. (Video played at 4X speed) RGB represent inks with red, green, and blue color, respectively. Scale bar 5 mm.

**Movie S5 | Multimaterial bioprinting at high speed.** Demonstration of bioprinting with two inks where check valves are switched at a frequency of 4Hz. Scale bar 5 mm.

**Movie S6 | Simulation of 2 inks mixing and extrusion**

**Movie S7 | Simulation of 4 inks mixing and extrusion**

**Movie S8 | Simulation of 6 inks mixing and extrusion**

**Movie S9 | Simulation of 7 inks mixing for core-shell geometry**

**Movie S10 | Simulation of 7 inks mixing for donut shaped geometry**

**Movie S11 | Perfusion across a hollow linear vessel**

**Movie S12 | Bioprinting of liver construct.** (Video played at 8X speed).

**Movie S13 | Bioprinting of a skeletal muscle.** (Video played at 8X speed)

**Movie S14 | Volumetric reconstruction of the bioprinted spiral 7 days post implantation**  
(Video played at 4X speed)

## Supplementary Table S1

### Comparison of different multimaterial bioprinter speeds from the literature

| Bioprinter Feature                                            | Mode                                 | Maximum Speed | Authors               | Reference       |
|---------------------------------------------------------------|--------------------------------------|---------------|-----------------------|-----------------|
| Multimaterial 3D bioprinter                                   | Single nozzle multimaterial          | 10 m/s        | Kolesky D B et al     | 1               |
| Rapid continuous multimaterial extrusion bioprinting          | Multinozzle (Co-axial) multimaterial | ~ 10mm/s      | Liu W et al           | 2               |
| 6 Degree of freedom bioprinter with pressure pump             | Multinozzle (Co-axial) multimaterial | 20 mm/s       | Khan Z et al          | 3               |
| 3D biofactory                                                 | Single nozzle multimaterial          | 0.4 mm/s      | Avila-Ramirez A et al | 4               |
| A hybrid bioprinting approach for scale-up tissue fabrication | Multi-arm hybrid bioprinter          | 14 mm/s       | Yu Y et al            | 5               |
| Intra-volumetric multimaterial                                | Single nozzle multimaterial          | ~ 25 mm/s     | Hassan S et al        | This manuscript |

## References

1. Kolesky, D. B.; Truby, R. L.; Gladman, A. S.; Busbee, T. A.; Homan, K. A.; Lewis, J. A., 3D Bioprinting of Vascularized, Heterogeneous Cell-Laden Tissue Constructs. *Advanced Materials* **2014**, 26 (19), 3124-3130.
2. Liu, W.; Zhang, Y. S.; Heinrich, M. A.; De Ferrari, F.; Jang, H. L.; Bakht, S. M.; Alvarez, M. M.; Yang, J.; Li, Y. C.; Trujillo-de Santiago, G.; Miri, A. K.; Zhu, K.; Khoshakhlagh, P.; Prakash, G.; Cheng, H.; Guan, X.; Zhong, Z.; Ju, J.; Zhu, G. H.; Jin, X.; Shin, S. R.; Dokmeci, M. R.; Khademhosseini, A., Rapid Continuous Multimaterial Extrusion Bioprinting. *Adv Mater* **2017**, 29 (3).
3. Khan, Z.; Kahin, K.; Rauf, S.; Ramirez-Calderon, G.; Papagiannis, N.; Abdulmajid, M.; Hauser, C. A. E., Optimization of a 3D bioprinting process using ultrashort peptide bioinks. *Int J Bioprint* **2018**, 5 (1), 173-173.
4. Avila-Ramirez, A.; Catzim-Ríos, K.; Guerrero-Beltrán, C. E.; Ramírez-Cedillo, E.; Ortega-Lara, W., Reinforcement of Alginate-Gelatin Hydrogels with Bioceramics for Biomedical Applications: A Comparative Study. *Gels* **2021**, 7 (4), 184.
5. Yu, Y.; Zhang, Y.; Ozbolat, I. T., A Hybrid Bioprinting Approach for Scale-Up Tissue Fabrication. *Journal of Manufacturing Science and Engineering* **2014**, 136 (6).
